# Supplementary material for: Labdanum Resin from Cistus ladanifer L.: A Natural and Sustainable Ingredient for Skin Care Cosmetics with Relevant Cosmeceutical Bioactivities
Source: MDPI journal article supplement (doi:10.3390/plants11111477), 2022-05-31
Supplement: s1 [file s1]

## Supplementary material

### **Labdanum resin from *Cistus ladanifer* L.: a natural and sustainable ingredient for skin care cosmetics with relevant cosmeceutical bioactivities**

David F. Frazão <sup>1,2</sup>, Carlos Martins-Gomes <sup>1</sup>, Jan L. Steck <sup>3</sup>, Judith Keller <sup>3</sup>, Fernanda Delgado <sup>2,4</sup>, José C. Gonçalves <sup>2,4</sup>, Mirko Bunzel <sup>3</sup>, Cristina M. B. S. Pintado <sup>2,4</sup>, Teresa Sosa Díaz <sup>5</sup>, Amélia M. Silva <sup>1,6,\*</sup>

<sup>1</sup> Center for Research and Technology of Agro-Environmental and Biological Sciences (CITAB-UTAD), University of Trás-os-Montes e Alto Douro (UTAD), Quinta de Prados, 5001-801 Vila Real, Portugal; davidmfrazao@gmail.com (D.F.F.), camgomes@utad.pt (C.M.G.)

<sup>2</sup> Plant Biotechnology Center of Beira Interior (CBPBI), Quinta da Senhora de Mércules, Apartado 119, 6001-909 Castelo Branco, Portugal; jcgoncalves@ipcb.pt (J.C.G.),

<sup>3</sup> Department of Food Chemistry and Phytochemistry, Institute of Applied Biosciences, Karlsruhe Institute of Technology (KIT), Adenauerring 20a, Building 50.41, 76131 Karlsruhe, Germany; jan.steck@kit.edu (J.L.S.), judith.keller@kit.edu (J.K.), mirko.bunzel@kit.edu (M.B.)

<sup>4</sup> Polytechnic Institute of Castelo Branco - School of Agriculture (IPCB-ESA), Quinta da Senhora de Mércules, 6001-909 Castelo Branco, Portugal; fdelgado@ipcb.pt (F.D.), cpintado@ipcb.pt (C.M.B.S.P.)

<sup>5</sup> Department of Plant Biology, Ecology and Earth Sciences, Faculty of Science, University of Extremadura, 06006 Badajoz, Spain; tesosa@unex.es (T.S.D.)

<sup>6</sup> Department of Biology and Environment, School of Life Sciences and Environment, UTAD, Quinta de Prados; 5001-801 Vila Real, Portugal; amsilva@utad.pt (A.M.S.)

\* Correspondence: amsilva@utad.pt (A.M.S.); Tel.: +351 259 350 921

# Supplementary Figure S1

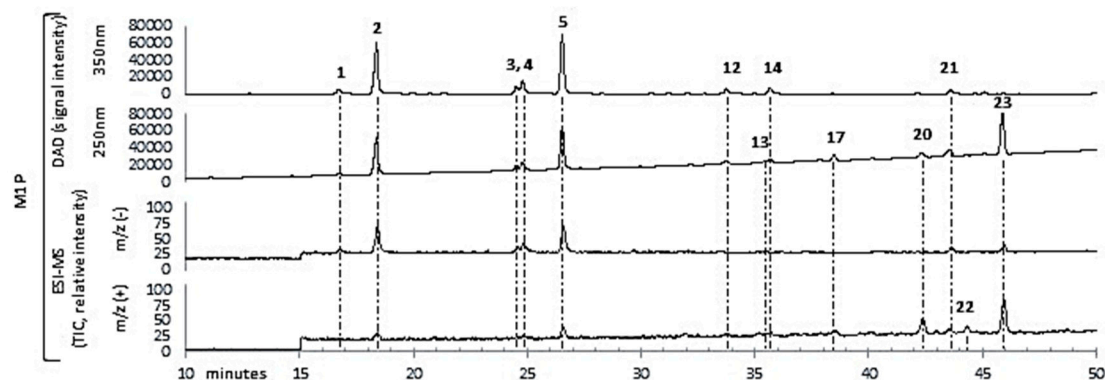

**Figure S1.1.** DAD (250 and 350 nm, absolute intensity) and MS (TIC,  $m/z^-$  and  $m/z^+$ , relative intensity) chromatograms obtained in the UPLC-DAD-ESI-MS analysis of labdanum absolute. Numbers represent a peak at a retention time as presented in Table 2.

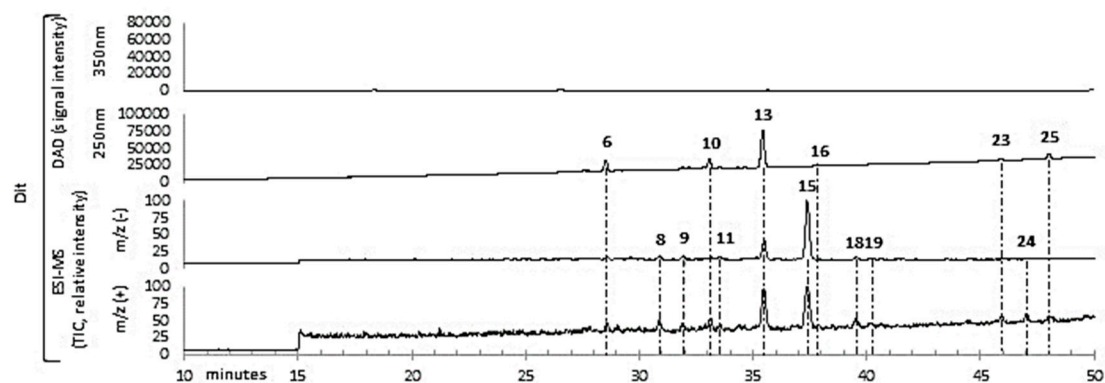

**Figure S1.2.** DAD (250 and 350 nm, absolute intensity) and MS (TIC,  $m/z^-$  and  $m/z^+$ , relative intensity) chromatograms obtained in the UPLC-DAD-ESI-MS analysis of diterpenoid fraction from labdanum absolute. Numbers represent a peak at a retention time as presented in Table 2.

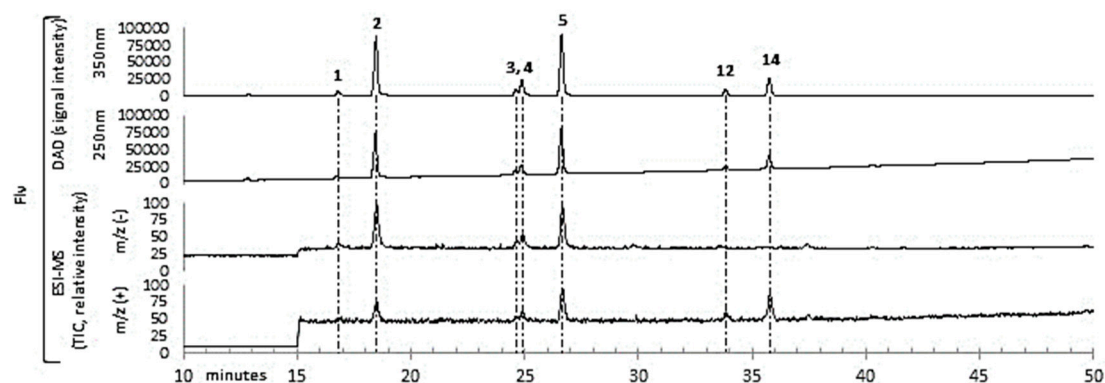

**Figure S1.3.** DAD (250 and 350 nm, absolute intensity) and MS (TIC,  $m/z^-$  and  $m/z^+$ , relative intensity) chromatograms obtained in the UPLC-DAD-ESI-MS analysis of "flavonoid" fraction from labdanum absolute. Numbers represent a peak at a retention time as presented in Table 2.

## Supplementary Figure S2

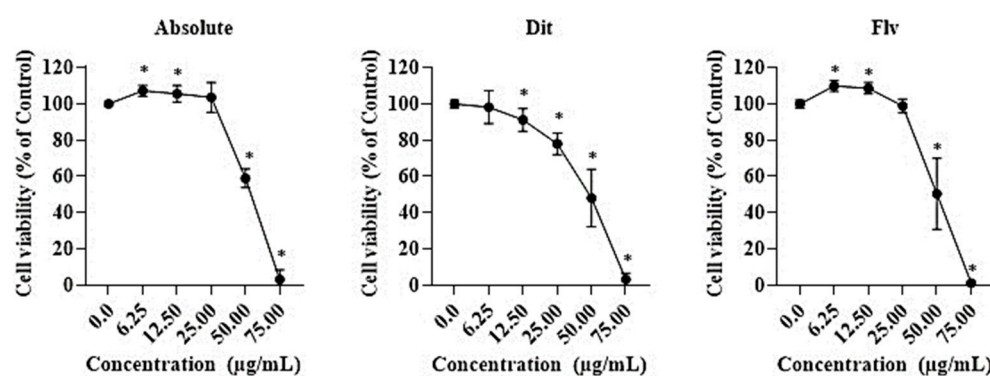

**Figure S2.** RAW 264.7 (murine macrophage) cells viability, as percentage of control (cells not exposed to the compounds, denoted as 0.00  $\mu\text{g/mL}$ ), of labdanum absolute and its fractions at concentrations between 6.25 and 100  $\mu\text{g/mL}$  (mean values  $\pm$  S.D.). Symbol (\*) mean significant difference ( $\alpha = 0.05$ ) in relation to the control by the post-hoc Tuckey's test.
